# Supplementary material for: Real-Life Outcomes of Coronary Bifurcation Stenting in Acute Myocardial Infarction (Zabrze–Opole Registry)
Source: MDPI journal article supplement (doi:10.3390/jcdd8110155), 2021-11-11
Supplement: s1 [file s1]

---

**Table S1. Clinical characteristics.**

---

| <b>Characteristic</b>              | <b>STEMI (n=31)</b> | <b>NonSTEMI (n=82)</b> | <b>P value</b> |
|------------------------------------|---------------------|------------------------|----------------|
| <b>Male sex</b>                    | 19 (61)             | 58 (71)                | 0.34           |
| <b>Age (years)</b>                 | 63 (58-74)          | 64 (59-74)             | 0.63           |
| <b>BMI (kg/m<sup>2</sup>)</b>      | 27 (25-30)          | 28 (26-30)             | 0.60           |
| <b>Obesity</b>                     | 4 (13)              | 29 (23)                | 0.23           |
| <b>Renal insufficiency</b>         | 3 (9.7)             | 9 (11)                 | 0.84           |
| <b>Ejection fraction (%)</b>       | 44 (35-50)          | 49 (40-60)             | 0.08           |
| <b>Diabetes mellitus</b>           | 10 (32)             | 25 (31)                | 0.86           |
| <b>Hypertension</b>                | 24 (77)             | 68 (83)                | 0.50           |
| <b>Dyslipidemia</b>                | 26 (84)             | 62 (76)                | 0.35           |
| <b>Smoker</b>                      | 11 (36)             | 34 (42)                | 0.56           |
| <b>Familial history<br/>of CAD</b> | 5 (16)              | 26 (32)                | 0.10           |
| <b>Prior AMI</b>                   | 4 (13)              | 17 (21)                | 0.34           |
| <b>Prior PCI</b>                   | 4 (13)              | 14 (17)                | 0.59           |
| <b>Prior CABG</b>                  | 0 (0)               | 8 (9.8)                | 0.07           |
| <b>Carotid<br/>atherosclerosis</b> | 0 (0)               | 5 (6.1)                | 0.32           |
| <b>PAD</b>                         | 2 (6.5)             | 9 (11)                 | 0.72           |

---

Data are presented as n (%) or median (25<sup>th</sup>-75<sup>th</sup> percentile).

---

AMI – acute myocardial infarction; BMI – body mass index; CAD – coronary artery disease; PCI – percutaneous coronary intervention; CABG – coronary artery bypass grafting; PAD – peripheral artery disease

Outcomes should be interpreted with caution to small group sizes.

**Table S2. Angiographic and procedural characteristics**

| Characteristic                       | STEMI (n=31) | NonSTEMI (n=82) | P value         |
|--------------------------------------|--------------|-----------------|-----------------|
| <b>Femoral approach</b>              | 30 (97)      | 72 (88)         | 0.28            |
| <b>Culprit vessel</b>                |              |                 |                 |
| LM                                   | 4 (13)       | 13 (16)         | 0.77            |
| LAD                                  | 29 (94)      | 57 (70)         | <b>0.007</b>    |
| Cx                                   | 2 (6.5)      | 16 (20)         | 0.15            |
| RCA                                  | 1 (3.2)      | 5 (6.1)         | 1.0             |
| <b>Thrombus</b>                      | 11 (36)      | 8 (9.8)         | <b>&lt;0.01</b> |
| <b>Ostial lesion</b>                 | 14 (45)      | 25 (31)         | 0.14            |
| <b>Restenosis</b>                    | 0 (0)        | 3 (3.7)         | 0.56            |
| <b>Calcifications</b>                | 3 (9.7)      | 17 (21)         | 0.27            |
| <b>DES 2<sup>nd</sup> generation</b> | 22 (71)      | 46 (56)         | 0.17            |
| <b>No of DES/lesion</b>              | 1 (1;1)      | 1 (1;2)         | <b>0.04</b>     |
| <b>Length of DES/lesion (mm)</b>     | 23 (18-28)   | 25 (18-33)      | 0.22            |

|                                         |                |                 |                  |
|-----------------------------------------|----------------|-----------------|------------------|
| <b>Direct stenting</b>                  | 29 (26)        | 90 (47)         | 0.65             |
| <b>Maximal inflation pressure (atm)</b> | 16 (12-18)     | 14 (12-16)      | 0.26             |
| <b>GP IIbIIIa</b>                       | 7 (23)         | 12 (15)         | 0.31             |
| <b>Dedicated stent</b>                  | 4 (13)         | 9 (11)          | 0.75             |
| <b>True bifurcation</b>                 | 14 (45)        | 48 (59)         | 0.20             |
| <b>Main branch</b>                      |                |                 |                  |
| Stenosis severity                       | 99 (90-99)     | 90 (80-99)      | <b>0.001</b>     |
| Diameter                                | 3.0 (2.5-3.25) | 3.0 (2.75-3.25) | 0.77             |
| Initial TIMI flow                       | 2 (1-3)        | 3 (2-3)         | <b>&lt;0.001</b> |
| Final TIMI flow                         | 3 (3-3)        | 3 (3-3)         | 0.22             |
| MB residual stenosis >10%               | 1 (3.2)        | 1 (1.2)         | 0.48             |
| Stent length (mm)                       | 23 (18-28)     | 23 (18-28)      | 0.59             |
| Max inflation pressure (atm)            | 16 (12-18)     | 14 (12-16)      | 0.28             |
| <b>Side branch</b>                      |                |                 |                  |
| Stenosis severity                       | 40 (0-80)      | 57.5 (0-90)     | 0.64             |
| Diameter                                | 2.0 (2.0-2.5)  | 2.25 (2.0-2.5)  | 0.07             |
| Diameter >2.5mm                         | 12 (39)        | 51 (62)         | <b>0.025</b>     |

|                                  |            |              |                  |
|----------------------------------|------------|--------------|------------------|
| Initial TIMI flow                | 2 (1-3)    | 3 (2-3)      | <b>&lt;0.001</b> |
| Final TIMI flow                  | 3 (3-3)    | 3 (3-3)      | 0.49             |
| SB residual stenosis >10%        | 2 (6.5)    | 19 (23)      | 0.06             |
| Stent length                     | 15 (8-15)  | 18 (12-22.5) | 0.16             |
| Max inflation pressure           | 12 (10-14) | 13 (12-15)   | 0.14             |
| <b>SB occlusion</b>              | 1 (0.9)    | 1 (0.5)      | 1.0              |
| <b>Bifurcation angle &lt;90°</b> | 21 (68)    | 60 (73)      | 0.57             |
| <b>Stenting technique</b>        |            |              |                  |
| Provisional T-stenting           | 25 (81)    | 62 (76)      | 0.63             |
| Crush                            | 1 (3.2)    | 5 (6.1)      | 1.0              |
| V-stenting                       | 0 (0)      | 0 (0)        | -                |
| T-stenting                       | 4 (13)     | 14 (17)      | 0.78             |
| <b>Crossover</b>                 | 1 (3.2)    | 14 (17)      | 0.06             |
| <b>GW - SB</b>                   | 17 (55)    | 60 (73)      | 0.06             |
| <b>POT</b>                       | 9 (29)     | 18 (22)      | 0.45             |
| <b>Predilatation pressure</b>    | 12 (10-14) | 12 (10-14)   | 0.86             |
| <b>Initial Kissing Balloons</b>  | 0 (0)      | 5 (6.1)      | 0.32             |
| <b>Final Kissing Balloons</b>    | 3 (9.7)    | 21 (26)      | 0.08             |

|                             |                 |                 |              |
|-----------------------------|-----------------|-----------------|--------------|
| <b>SB stenting</b>          | 7 (23)          | 24 (29)         | 0.48         |
| <b>Procedure time (min)</b> | 60 (50-70)      | 60 (50-80)      | 0.14         |
| <b>Contrast volume (ml)</b> | 150 (100-150)   | 150 (125-190)   | <b>0.001</b> |
| <b>Radiation time (min)</b> | 13 (8-21)       | 15.5 (10.5-20)  | 0.79         |
| <b>Radiation dose (mGy)</b> | 1343 (791-1575) | 1355 (910-2019) | 0.24         |

Data are presented as n (%) or median (25<sup>th</sup>-75<sup>th</sup> percentile)

AMI – acute myocardial infarction; LM – left main; LAD – left anterior descending artery; Cx- circumflex artery; RCA – right coronary artery; DES – drug eluting stent.

Outcomes should be interpreted with caution to small group sizes.

**Table S3. Clinical outcomes.**

| <b>Characteristic</b>   | <b>STEMI (n=31)</b> | <b>NonSTEMI (n=82)</b> | <b>P value</b> |
|-------------------------|---------------------|------------------------|----------------|
| <b>Stent thrombosis</b> |                     |                        |                |
| Acute                   | 0 (0)               | 0 (0)                  | -              |
| Subacute                | 0 (0)               | 0 (0)                  | -              |
| Late                    | 1 (3.2)             | 2 (2.4)                | 1.0            |
| Cumulative              | 1 (3.2)             | 2 (2.4)                | 1.0            |
| <b>MACE-TLF</b>         | 1 (3.2)             | 12 (15)                | 0.11           |
| Death-TLF               | 0 (0)               | 2 (2.4)                | 1.0            |
| AMI-TLF                 | 1 (3.2)             | 6 (7.3)                | 0.67           |
| TLR                     | 1 (3.2)             | 8 (9.8)                | 0.44           |

---

Data are presented as n (%).

AMI – acute myocardial infarction; MACE – major adverse cardiac events; TLF – target lesion failure; TLR – target lesion revascularization.

Outcomes should be interpreted with caution to small group sizes.

---
